# Supplementary material
Source: PubMed Central journal article supplement (PMC3545286)
Supplement: emboj2012294s1.pdf [file emboj2012294s1.pdf]

## Supplementary Information

### Supplementary Figure Legends

**Supplementary Figure S1** The decrease in leaf organ size of *pATML1:GFP:GTL1* plants is mainly caused by reduction in cell size. (A) Light micrograph of a first true leaf from 8-day-old *pGL2:GFP:GTL1* plants (left panel) and *pATML1:GFP:GTL1* plants (right panel) and *GFP:GTL1* expression in corresponding leaves. White arrows highlight the nuclear GFP signal in developing trichomes. (B) Box-whisker plot (after Tukey) of the nuclear DNA content in mature trichomes. Trichomes were isolated from fourth and fifth leaves of 25-day-old wild-type and *p:ATML1:GFP:GTL1* lines ( $n=70$ ). The mean of measured fluorescence of DAPI-stained wild-type trichome nuclei was artificially set to 32C to normalize values for the *pATML1:GFP:GTL1* lines. Boxes encompass 50% of all data points (25 to 75% of data) and lines within a box are the medians. Error bars represent 5% (lower bar) and 95% (upper bar) of the data. Both transgenic lines of *pATML1:GFP:GTL1* have significantly reduced trichome ploidy levels compared to wild-type (Tukey's multiple comparison test,  $P < 0.001$ ). (C) Ploidy distribution of nuclei isolated from the first two true leaves of 21-day-old wild-type (Col) and two independent *pATML1:GFP:GTL1* lines (1-2, 2-2). Nuclear ploidy levels were quantified by flow cytometer ( $n=10$ ). (D-F) Comparison of leaf area, cell area and cell number between wild-type and *pATML1:GFP:GTL1* lines. The surface area of first two true leaves from 21-day-old plants was quantified ( $n=10$ ). The surface area of epidermal pavement cells, excluding stomata guard cells and trichomes, was quantified using at least 10 leaves at an equivalent developmental stage and cell number was estimated by dividing average leaf area by average epidermal cell area ( $n=450$ ). Asterisks indicate a significant difference between Col and *pATML1:GFP:GTL1* (Student's *t*-test,  $P < 0.0001$ ).

**Supplementary Figure S2** Validation of putative GTL1 targets by ChIP-qPCR. (A) IGB snapshots of 17 randomly chosen target regions identified by ChIP-chip. (B) ChIP-qPCR confirms significant enrichment of GTL1 binding for 13 putative target sites (red bars, Student's *t*-test, *P*-values < 0.05). Four out of 17 targets (grey bars) do not show significant enrichment. ChIP-qPCR was conducted using three independent replicates. The coding region of the ACT2 locus served as a negative control (black bar).

**Supplementary Figure S3** The *gtl1-1 ccs52a1-2* double mutants display under-branched trichome phenotypes almost identical to *ccs52a1-2*. Trichomes were isolated from third and fourth leaves of 22-day-old wild-type, *gtl1-1*, *ccs52a1-2* and *gtl1-1 ccs52a1-2* plants, and number of branch for individual trichomes was quantified. The values on the y-axis represent the relative percentage of trichomes with given number of branches (n > 166).

**Supplementary Data S1** Putative GTL1 targets identified by ChIP-chip analysis

**Supplementary Data S2** GTL1 responsive genes identified by microarray analysis

**Supplementary Data S3** GTL1 targets identified by both ChIP-chip and microarray analyses

# Supplementary Figure S1

**A**

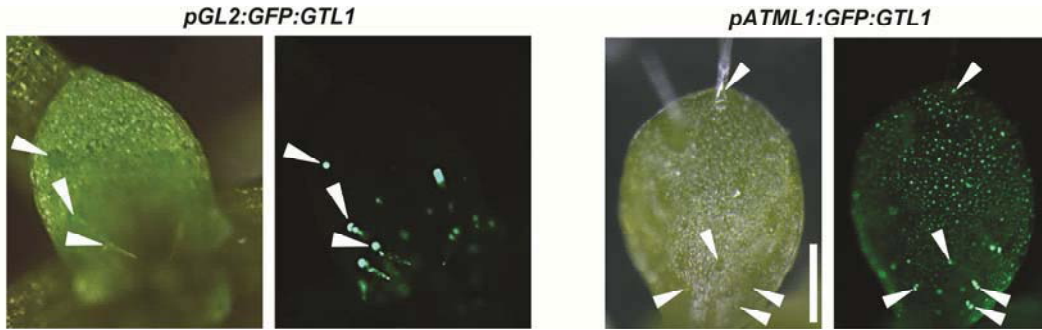

**B**

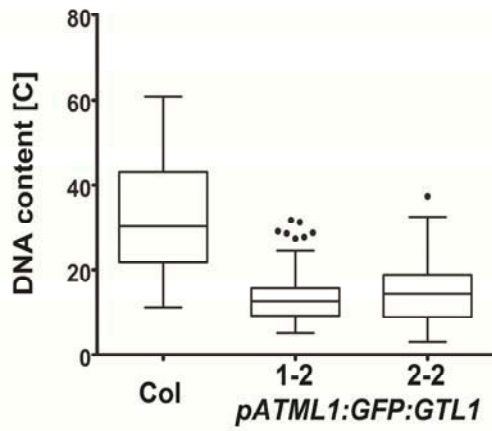

**D**

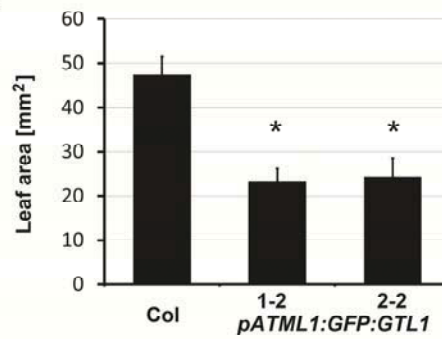

**C**

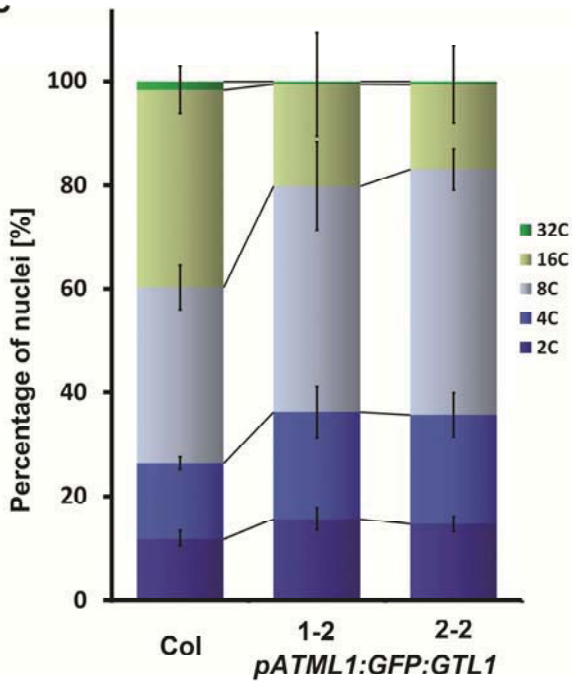

**E**

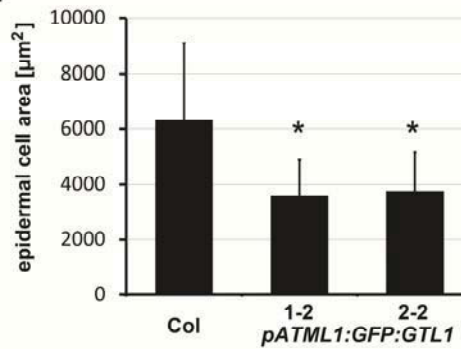

**F**

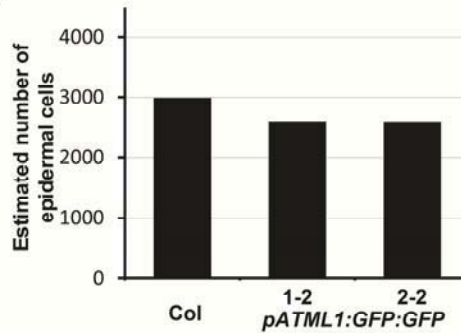

# Supplementary Figure S2

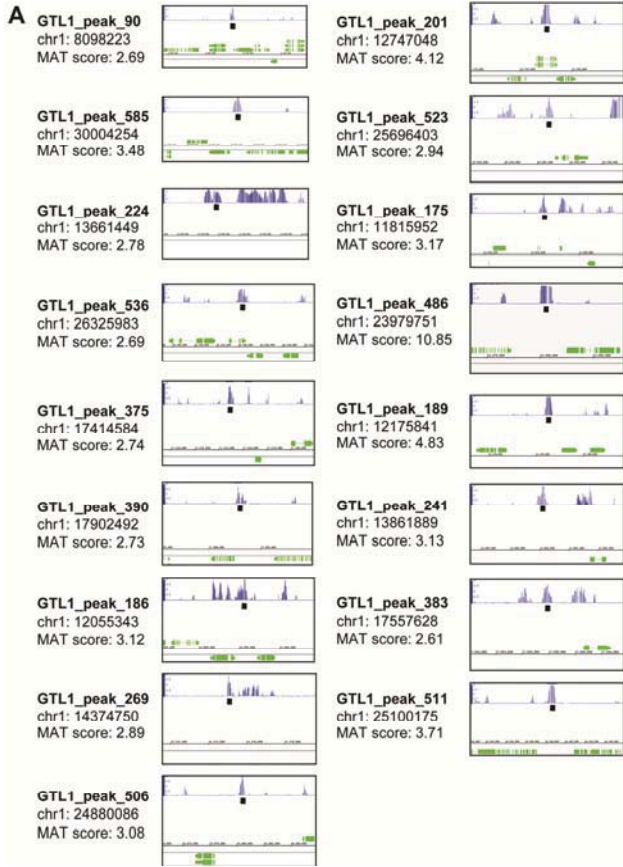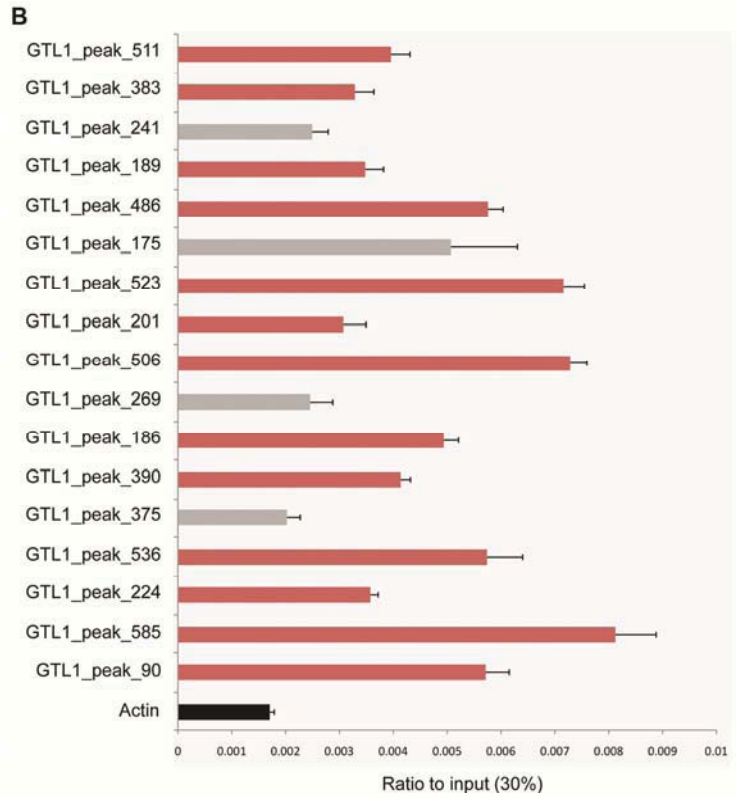

# Supplementary Figure S3

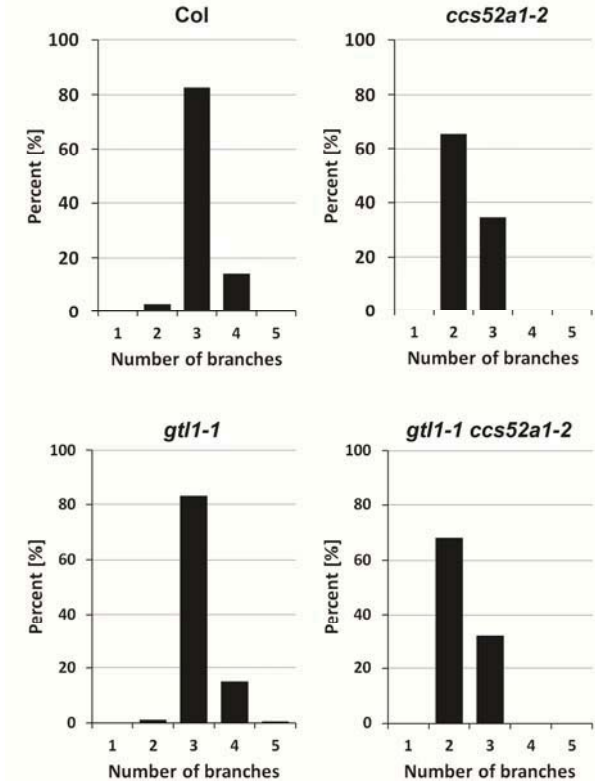

**Supplementary Table S1** ChIP-qPCR oligonucleotides

| Target                               | Oligonucleotide name | Sequence 5'-3'              |
|--------------------------------------|----------------------|-----------------------------|
| <b><i>CCS52A1</i> locus</b>          |                      |                             |
| I                                    | A1-2500F2            | TCTCATGATCAGAGATTACACC      |
|                                      | A1-2500R2            | AATTAGCATGACTCTCTCCGG       |
| II                                   | A1-1350F1            | GTAAACGGCTATAATCGTTAG       |
|                                      | A1-1350R1            | CATTTAATTA AAAAGTTGGAAAAGAG |
| III                                  | A1-800F1             | TGATCAATTTCTTATAGTTGACAG    |
|                                      | A1-800R1             | AATAAGCTAAAGTCTAAAATCTTAG   |
| IV                                   | A1-100F2             | CCAACGATTAAGATTGAATCAGAAG   |
|                                      | A1-100R4             | TTTCTTCAGATTGAACAAAAGGC     |
| V                                    | A1+2600F1            | CGAGCTTGTTAGCACACACG        |
|                                      | A1+2600R1            | ACCGCAAGGTATAAGACTCG        |
| pACT                                 | ACTF                 | CTAACGTTGCCTGGATTGACTC      |
|                                      | ACTR                 | GCTTCATGACTGTGACCTGCT       |
| <b><i>ChIP random validation</i></b> |                      |                             |
| Peak 90                              | GTL1_90-A1           | TCCTCCTCCTCTTCTGGGTT        |
|                                      | GTL1_90-B1           | TAGACCGGAAAAGTGATCGG        |
| Peak585                              | GTL1_585-A1          | GCAGAGCTTCCCAGTCAAAC        |
|                                      | GTL1_585-B1          | CGCGTGAGGGAGTTTTCTAT        |
| Peak 224                             | GTL1_224 R-A1        | AGGAGCCCAGGTTCTAGAGG        |
|                                      | GTL1_224 R-B1        | AGCCTCCACTGGTACCACAC        |
| Peak 536                             | GTL1_536-A1          | TACAGAGCGTGTGGATGGAG        |
|                                      | GTL1_536-B1          | ACCTTCACACCCACAACCAT        |
| Peak 375                             | GTL1_375 R-A1        | ACCCA ACTCTTTACGGCTGA       |
|                                      | GTL1_375 R-B1        | GCTGGTTGGGTTATGAAGGA        |
| Peak 390                             | GTL1_390-A1          | CGTGA ACTTTTAGGTCGGTCA      |
|                                      | GTL1_390-B1          | TCTTGGGAATTTTGGTCTGG        |
| Peak 186                             | GTL1_186-A1          | TTGCTAGACTCATTGGACGC        |
|                                      | GTL1_186-B1          | CCATGCATGTTCTTGATTCC        |
| Peak 269                             | GTL1_269 R-A1        | TCATTCACTTCACCACCCTCT       |
|                                      | GTL1_269 R-B1        | GGCTAGGCTAAGGATATGGGA       |
| Peak 506                             | GTL1_506-A1          | CGATTGATGTGAATGGCAAC        |
|                                      | GTL1_506-B1          | TCAACATCAACTTCCCTCCC        |
| Peak 201                             | GTL1_201-A1          | GAATTGCCGTTGGAAGTGTT        |
|                                      | GTL1_201-B1          | TGGCAAGAACCACAAACGTA        |
| Peak 523                             | GTL1_523-A1          | TCCGATTTACA ACTAGCCCA       |
|                                      | GTL1_523-B1          | GGGATTGTAGTATGTGTGACTGAC    |
| Peak 175                             | GTL1_175-A1          | TAAGGTCCCTCGA ACCATGA       |
|                                      | GTL1_175-B1          | CTCGGAAATGTCAACGTAACAG      |
| Peak 486                             | GTL1_486-A1          | CTTTTTCCTTCGTGCTTTGC        |
|                                      | GTL1_486-B1          | TGTGCCTAGCTCTTGAAGCTC       |
| Peak 189                             | GTL1_189 R-A1        | CTCCCAAACGTCTCGATGAT        |
|                                      | GTL1_189 R-B1        | GGTATGGCTGCCAAGGAATA        |

|          |             |                      |
|----------|-------------|----------------------|
| Peak 241 | GTL1_241-A1 | TTCTTTTACCCCCACATGC  |
|          | GTL1_241-B1 | ATGCATGGATGCTCCAAACT |
| Peak 383 | GTL1_383-A1 | AGGTGTTGTTGAAGGGTTGC |
|          | GTL1_383-B1 | CAAGGGCAAATCTTAGGCAT |
| Peak 511 | GTL1_511-A1 | TTGGTCGGATTGAAGATTCC |
|          | GTL1_511-B1 | AGACACGTGGGAAGTGGAAG |
